# Supplementary material for: Integrating Single-cell Analysis, Spatial Transcriptomics, Mendelian Randomisation And Machine Learning Frameworks To Identify TNFAIP6 and CHI3L2 As Diagnostic Biomarkers For Osteoarthritis
Source: Research Square preprint supplement (doi:10.21203/rs.3.rs-7473624/v1), 2025-09-23
Supplement: Supplementary file 1 [file 005e7270ebc422e106920a7b.docx]

**Declaration of interests**
 
☐ The authors declare that they have no known competing financial interests or personal relationships that could have appeared to influence the work reported in this paper.
 
☒ The authors declare the following financial interests/personal relationships which may be considered as potential competing interests:

| Guoyou Wang reports financial support was provided by Southwest meidical university. Guoyou Wang reports a relationship with southwest medical unversity that includes: funding grants. Guoyou Wang has patent pending to Guoyou Wang. N/A If there are other authors, they declare that they have no known competing financial interests or personal relationships that could have appeared to influence the work reported in this paper. |
| --- |
