# Supplementary material for: Integrating Single-cell Analysis, Spatial Transcriptomics, Mendelian Randomisation And Machine Learning Frameworks To Identify TNFAIP6 and CHI3L2 As Diagnostic Biomarkers For Osteoarthritis
Source: Research Square preprint supplement (doi:10.21203/rs.3.rs-7473624/v1), 2025-09-23
Supplement: Supplementary file 2 [file 106fdc511aab661fd126065f.docx]

**Declaration of interests**
 
☒ The authors declare that they have no known competing financial interests or personal relationships that could have appeared to influence the work reported in this paper.
 
☐ The authors declare the following financial interests/personal relationships which may be considered as potential competing interests:

 
 
 
