# Supplementary material for: Integrating Single-cell Analysis, Spatial Transcriptomics, Mendelian Randomisation And Machine Learning Frameworks To Identify TNFAIP6 and CHI3L2 As Diagnostic Biomarkers For Osteoarthritis
Source: Research Square preprint supplement (doi:10.21203/rs.3.rs-7473624/v1), 2025-09-23
Supplement: Supplementary file 3 [file 1b24152e15ca270013ba9ac1.docx]

CRediT author statement

YDJ: Conceptualization, Methodology, Software,Writing- Original draft preparation,Writing- Reviewing.GGW: Data curation, Writing- Original draft preparation. CJJ,WS: Visualization, Investigation. WZH: Supervision.YZJ,XYL: Software, Validation.WGY: Editing,
