# Supplementary material for: Integrating Single-cell Analysis, Spatial Transcriptomics, Mendelian Randomisation And Machine Learning Frameworks To Identify TNFAIP6 and CHI3L2 As Diagnostic Biomarkers For Osteoarthritis
Source: Research Square preprint supplement (doi:10.21203/rs.3.rs-7473624/v1), 2025-09-23
Supplement: Supplementary file 4 [file 550e190e44b5e4ab0f18839e.docx]

Osteoarthritis:OA

Oxidative stress-related genes:OSGs

Machine learning:ML

Oxidative Stress,:OS

Hd Weighted gene co-expression network analysis :HdWGCNA

Recursive Feature Elimination :RFE

UMAP:UniformManifoldApproximationandProjection

Gene Ontology :GO

Kyoto Encyclopedia of Genes and Genomes :KEGG

SVM:Support Vector Machines

HomC:homeostaticchondrocytes

RegC:regulatorychondrocytes

ProC:proliferatingchondrocytes

preHTC:prefibrocartilagechondrocytes

InfC:inflammatorychondrocytes

RBC:redbloodcells

HTC:hypertrophicchondrocytes

EC:effectorchondrocytes

RepC:repairchondrocytes

FC:fibrocartilagechondrocytes

Extracellular matrix :ECM

M1:Macrophage-1

M2:Macrophage-2

BMP:Bone Morphogenetic Protein-2

MMPs:Matrix MetalloProteinases

IL-:Interleukin-

NF-κB:Nuclear factor kappa-B

TLR2:Toll-like receptors-2

PI-3K:Phosphatidylinositol 3-kinase

ATP: Adenosinetriphosphate

ROS: Reactive Oxygen Species

TNF: Tumor Necrosis Factor

MAPK:Mitogen-Activated Protein Kinase

RANKL:Receptor Activator of Nuclear Factor-κ B Ligand

JNK: C-Jun N-terminal kinase
