# Supplementary material for: Integrating Single-cell Analysis, Spatial Transcriptomics, Mendelian Randomisation And Machine Learning Frameworks To Identify TNFAIP6 and CHI3L2 As Diagnostic Biomarkers For Osteoarthritis
Source: Research Square preprint supplement (doi:10.21203/rs.3.rs-7473624/v1), 2025-09-23
Supplement: Supplementary file 5 [file 96abd9fa3fc0931d7807c87f.docx]

Declaration of Figures Authenticity: All figures submitted have been created by the authors who confirm that the images are original with no duplication and have not been previously published in whole or in part
