# Supplementary material for: Integrating Single-cell Analysis, Spatial Transcriptomics, Mendelian Randomisation And Machine Learning Frameworks To Identify TNFAIP6 and CHI3L2 As Diagnostic Biomarkers For Osteoarthritis
Source: Research Square preprint supplement (doi:10.21203/rs.3.rs-7473624/v1), 2025-09-23
Supplement: Supplementary file 6 [file 99f20d3248e48361c97e5e0d.xlsx]

## Sheet: Sheet1
IVD fibrosis and disc collapse comprehensively aggravate vertebral body disuse osteoporosis and zygapophyseal joint osteoarthritis by posteriorly shifting the load transmission pattern	Comput Biol Med 2023		Xi Z, Xie Y, Sun S, Wang N, Chen S, Wang G*, Li J*	Q1 7.7
A Novel Adjustable EndoButton Fixation Assisted by 3D Printing Technology for Tibiofibular Syndesmosis Injury: A Biomechanical Study	Front Bioeng Biotechnol 2022		Zhang L, Xu J, Tang X, Zhou X, Li B, Wang G*	Q1 5.7
External stimulation: A potential therapeutic strategy for tendon-bone healing	Front Bioeng Biotechnol 2023		Fu S, Lan Y, Wang G, Bao D, Qin B, Zheng Q, Liu H, Wong VKW.	Q1 5.7
A novel adjustable Endobutton fixation assisted by 3D printing technology for tibiofibular syndesmosis injury: a biomechanical study	Frontiers in Bioengineering and Biotechnology 2022		Lei Zhang, Junjie Xu#, Xiangyu Tang#, Xin Zhou, Bingkun Li, Guoyou Wang*	Q1 5.7
Combination of graphene oxide and platelet-rich plasma improves tendon–bone healing in a rabbit model of supraspinatus tendon reconstruction	Regenerative Biomaterials 2021		Bao Dingsu, Sun Jiacheng, Gong Min, Shi Jie, Qin Bo, Deng Kai, Liu Gang, Zeng Shengqiang, Xiang Zhou, Fu Shijie*	Q2 5.7
Mechanisms of inhibition of nucleus pulposus cells pyroptosis through SDF1/CXCR4-NFKB-NLRP3 axis in the treatement of intervertebral discdegnration by duhuo jisheng decoction	International immunopharmacology 2023		Guo D, Cheng K, Song C, Liu F, Cai W, Chen J, Mei Y, Zhou D, Gao S, Wang G*, Liu Z*.	Q2 Top 5.6
The Relationship between Calcaneal Spur Type and Plantar Fasciitis in Chinese Population.	Biomed Res Int 2020		Zhang L, Cheng HW, Xiong LJ, Xia ZR, Zhang MY, Fu SJ, Wang GY*.	Q3 3.41
Outcomes from Osteochondral Autograft Transplant or Mosaicplasty in 26 Patients with Type V Osteochondral Lesions of the Talus	Med Sci Monit 2021		Zhang L, Luo Y, Zhou X, Fu S, Wang G*.	Q3 3.38
Comparative Evaluation of Metallic and Biodegradable Suture Anchors in Arthroscopic Repair of Anterior Talofibular Ligament Injury: A Short-term Study on Clinical and Functional Outcomes	Med Sci Monit 2023		Zhang L, Tang X, You G, Chen X, Yang S, Wang G*.	Q3 3.1
Association between subtalar articular surface typing and flat foot deformity: which type is more likely to cause flat foot deformity	2021年 BMC Musculoskelet Disord		Zhang L, Peng X, He S, Zhou X, Yi G, Tang X, Li B, Wang G, Zhao W, Yang Y	Q3 2.56
The morphology of osseous structure in subtalar joint with chronic ankle instability	2024 Foot Ankle Surg		Zhang L, Sun X, Jiang L, Zhou X, Shi H, Yang Y, Cai M, Wang G*	Q2 2.5
Efficacy of Transosseous Tunnel Placement for Triple Endobutton Plate in Acromioclavicular Joint Reconstruction: A Three-Dimensional Printing Guide Design Technology	2021年 Orthopaedic Surgery		Zhang L, Wen Y, Zhang MY, Zhou X, Fu SJ*	Q3 2.27
Relationship between Classification of Fabellae and the Severity of Knee Osteoarthritis: A Relevant Study in the Chinese Population	2022年 Orthop Surg		Zhang L, Wen YL, He CY, Zeng Y, Wang JQ, Wang GY*.	Q3 2.19
